# Supplementary material for: Self-Assembling Peptide SCIBIOIII Hydrogel for Three-Dimensional Cell Culture That Promotes Wound Healing in Diabetic Mice
Source: MDPI journal article supplement (doi:10.3390/gels9040265), 2023-03-23
Supplement: s1 [file s1]

**Table S1**

Primer sequence

|                     |                        |
|---------------------|------------------------|
| M- $\alpha$ -Sma-F: | TCAGCAAACAGGAATACGACGA |
| M- $\alpha$ -Sma-R: | TTGGAAAGGAAGTGGAGGCG   |
| M-Coll1a1-F:        | TGTGTTCCCTACTCAGCCGT   |
| M-Coll1a1-R:        | GTGCTTCTTTTCCTTGGGGTTC |
| M-Vegfa-F:          | CTGGAAGAATCGGGAGCCTG   |
| M-Vegfa-R:          | AGGTGGGGTAAGGAGAGGAC   |
| Mouse GAPDH-F       | TGTGTCCGTCGTGGATCTGA   |
| Mouse GAPDH-R       | TTGCTGTTGAAGTCGCAGGAG  |
